# Supplementary material for: Microbial Profile and Genetic Polymorphism of Predominant Species in Some Traditional Fermented Seafoods of the Hainan Area in China
Source: Front Microbiol. 2019 Mar 21;10:564. doi: 10.3389/fmicb.2019.00564 (PMC6448011; doi:10.3389/fmicb.2019.00564)
Supplement: TABLE S1 — The sampling sites of fermented seafood. [file Table_1.XLSX]

## Sheet: Sheet1
	Samples	sample_ID	Area
FV	FBS	FBS1	Baisha
		FBS2	Baisha
		FBS3	Baisha
		FBS4	Baisha
		FBS5	Changjiang
		FBS6	Lingao
		FBS7	Lingao
		FBS8	Lingao
	FCC	FCC1	Wenchang
		FCC2	Wenchang
		FCC3	Wenchang
		FCC4	Wenchang
		FCC5	Wanning
		FCC6	Wanning
		FCC7	Wanning
		FCC8	Wuzhishan
		FCC9	Changjiang
		FCC10	Changjiang
		FCC11	Lingao
	FW	FW1	Qiongzhong
		FW2	Wuzhishan
		FW3	Baisha
		FW4	Changjiang
		FW5	Changjiang
		FW6	Lingao
FS	FC	FC1	Wanning
		FC2	Wanning
		FC3	Wanning
		FC4	Wanning
		FC5	Wanning
	FF	FF1	Lingshui
		FF2	Lingshui
		FF3	Lingshui
		FF4	Lingshui
		FF5	Baoting
		FF6	Baoting
		FF7	Qiongzhong
		FF8	Qiongzhong
		FF9	Qiongzhong
	FS	FS1	Wanning
		FS2	Lingshui
		FS3	Lingshui
		FS4	Baoting
		FS5	Ledong
		FS6	Ledong
		FS7	Ledong
		FS8	Ledong
		FS9	Qiongzhong
